# Supplementary material
Source: PubMed Central journal article supplement (PMC2825421)

**Fig. S1.** Knock-down of MST1 decreases JNK phosphorylation. Lysates of COS7 cells transfected with MST1 shRNA or the control vector were immunoblotted with anti-pJNK1/2 or MST1 or Erk1/2 antibody. Asterisks indicate the non-specific bands. Knock-down MST1 reduces STS-induced JNK phosphorylation.

**Fig. S2.** STS and Rotenone could induce MST1 activation. Lysates of COS7 cells transfected with wild-type MST1 or S82A MST1 or the control vector and treated with STS (0.1 $\mu$ M, 3 hours) or VP16 (50  $\mu$ M, 6 hours) or Rotenone (5  $\mu$ M, 6 hours) were immunoblotted with anti-pT183 MST1 or MST1 or Erk1/2 antibody. VP16 could not activate MST1 in comparison with STS and Rotenone treatment.

**Figure S1**

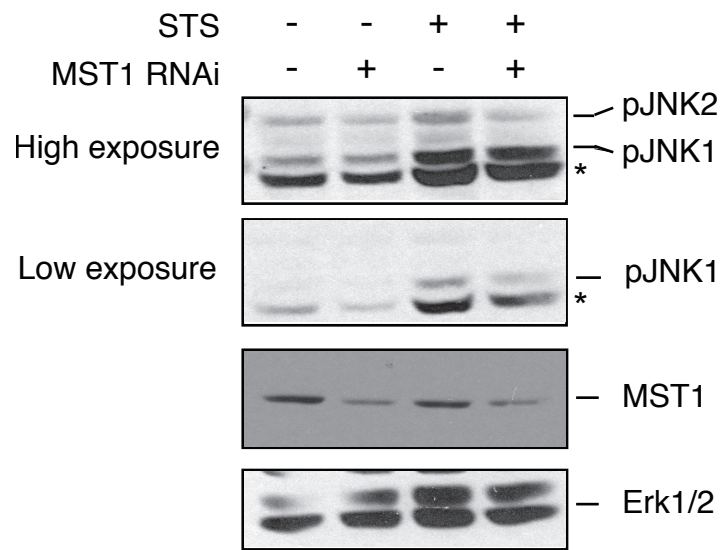

Figure S2

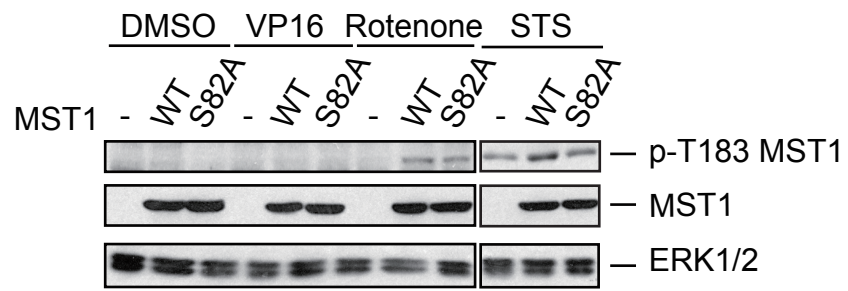

Supplement: supp_M109.038570_jbc.M109.038570-1.pdf [file supp_M109.038570_jbc.M109.038570-1.pdf]
